# Supplementary material for: Getting faster: low temperature copper-mediated SARA ATRP of methacrylates, acrylates, styrene and vinyl chloride in polar media using sulfolane/water mixtures
Source: Royal Society of Chemistry journal article supplement (doi:10.1039/c5ra20872f), 2016-01-01
Supplement: c5ra20872f1.pdf [file c5ra20872f1.pdf]

## Supporting Information

# Getting faster: low temperature copper-mediated ATRP of methacrylates, acrylates, styrene and vinyl chloride in polar media using sulfolane/water mixtures

*Joana P. Mendes,<sup>a</sup> Patrícia V. Mendonça,<sup>a</sup> Pedro Maximiano,<sup>a</sup> Carlos M. R. Abreu,<sup>a</sup>*

*Tamaz Guliashvili,<sup>b\*</sup> Arménio C. Serra<sup>a</sup> and Jorge F. J. Coelho<sup>a\*</sup>*

<sup>a</sup> CEMUC, Department of Chemical Engineering, University of Coimbra, 3030-790  
Coimbra, Portugal.

<sup>b</sup> Cytosorbents Inc. 7 Deer Park Drive Monmouth Junction, NJ 08852-192, USA.

\*Corresponding authors:

Email address – [jcoelho@eq.uc.pt](mailto:jcoelho@eq.uc.pt)

Email address – [tamazguliasvili@yahoo.com](mailto:tamazguliasvili@yahoo.com)

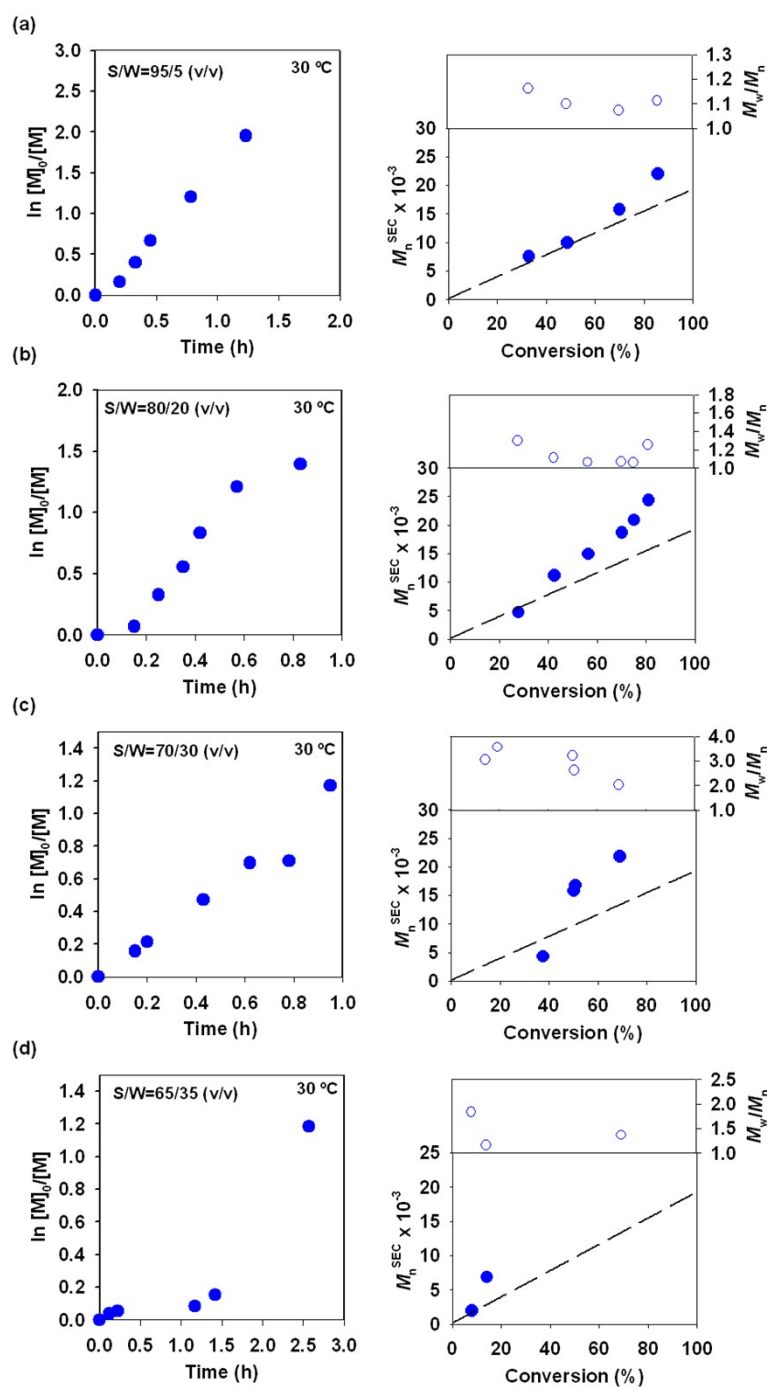

Figure S1. Kinetic plots of (a)  $\ln[M]_0/[M]$  vs. time and plot of number-average molecular weights ( $M_n^{SEC}$ ) and  $\mathcal{D}$  ( $M_w/M_n$ ) vs. conversion for the SARA ATRP of MA using Cu(0) wire as supplemental activator and reducing agent in sulfolane/water (S/W) mixtures at 30 °C. Conditions:  $[MA]_0/[solvent] = 2/1$  (v/v);  $[MA]_0/[EBiB]_0/Cu(0)wire/[Me_6TREN]_0 = 222/1/Cu(0)wire/1.1$  (molar); Cu (0):  $d = 1$  mm,  $l = 5$  cm.

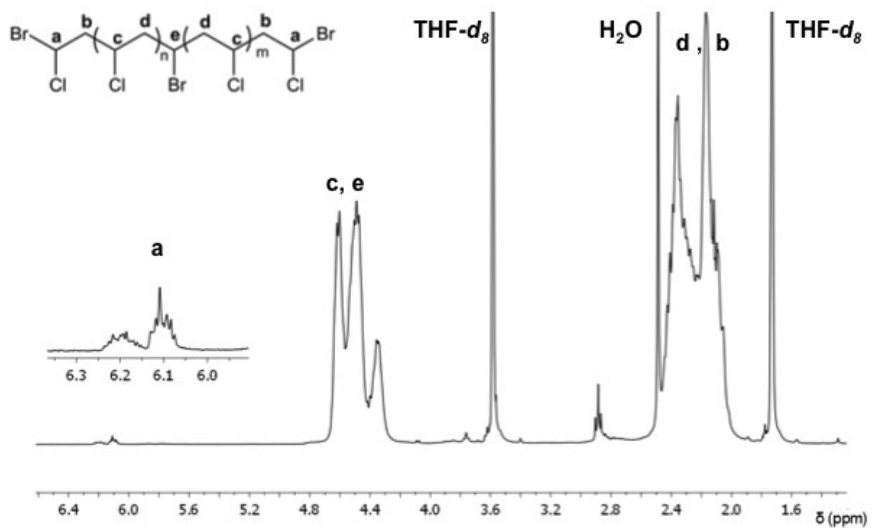

Figure S2.  $^1\text{H}$  NMR spectrum (solvent: THF- $d_8$ ) of a Br-PVC-Br ( $M_n^{\text{SEC}} = 7.8 \times 10^3$ ;  $D = 1.69$ ) sample obtained by SARA ATRP.
